# Supplementary material for: Association Between Geriatric Assessment and Post-Chemotherapy Functional Status in Older Patients with Cancer
Source: PubMed Central journal article supplement — Oncologist. 2022 Jul 21;27(11):e878–88. doi: 10.1093/oncolo/oyac131 (PMC9632320; doi:10.1093/oncolo/oyac131), 2022-07-21
Supplement: oyac131_suppl_supplementary_tables.pdf [file oyac131_suppl_supplementary_tables.pdf]

**Supplemental Table 1.** Association between CGA results and clinical endpoints in oncological patients

|                                  | Progressive disease and/or decline of IADL-independence (≥2 points) 1 year after chemotherapy |             |        | Overall survival |           |        | Premature termination of chemotherapy |           |       |
|----------------------------------|-----------------------------------------------------------------------------------------------|-------------|--------|------------------|-----------|--------|---------------------------------------|-----------|-------|
|                                  | OR                                                                                            | 95% CI      | p      | HR               | 95% CI    | p      | OR                                    | 95% CI    | p     |
| <b>Age</b>                       | 1.12                                                                                          | 1.01-1.24   | 0.037  | 1.05             | 0.99-1.11 | 0.124  | 1.09                                  | 1.00-1.19 | 0.048 |
| <b>Treatment intent</b>          |                                                                                               |             |        |                  |           |        |                                       |           |       |
| • Curative (n=72)                | Ref                                                                                           | Ref         |        | Ref              | Ref       | Ref    | Ref                                   | Ref       | Ref   |
| • Palliative (n=49)              | 5.45                                                                                          | 2.05-14.48  | <0.001 | 3.25             | 1.89-5.59 | <0.001 | 1.57                                  | 0.71-3.47 | 0.267 |
| <b>Tumor type</b>                |                                                                                               |             | 0.026  |                  |           | <0.001 |                                       |           | 0.158 |
| • Colorectal (n=77)              | Ref                                                                                           | Ref         | Ref    | Ref              | Ref       | Ref    | Ref                                   | Ref       | Ref   |
| • Other gastro-intestinal (n=16) | 19.96                                                                                         | 2.29-174.00 | 0.007  | 4.69             | 2.48-8.88 | <0.001 | 1.99                                  | 0.65-6.14 | 0.230 |
| • Breast or gynecological (n=18) | 0.49                                                                                          | 0.12-2.02   | 0.487  | 0.92             | 0.40-2.12 | 0.845  | 0.31                                  | 0.08-1.23 | 0.094 |
| • Urogenital (n=10)              | 0.72                                                                                          | 0.16-3.14   | 0.661  | 1.25             | 0.50-3.14 | 0.629  | 0.96                                  | 0.25-3.75 | 0.953 |
| <b>Abnormal G8</b>               | 4.12                                                                                          | 1.51-11.22  | 0.006  | 1.66             | 0.93-2.93 | 0.084  | 2.34                                  | 1.03-5.32 | 0.043 |
| <b>CGA</b>                       |                                                                                               |             |        |                  |           | 0.689  |                                       |           | 0.732 |
| • Fit                            | Ref                                                                                           | Ref         | Ref    | Ref              | Ref       | Ref    | Ref                                   | Ref       | Ref   |
| • Vulnerable                     | 1.08                                                                                          | 0.32-3.63   | 0.902  | 1.37             | 0.67-2.83 | 0.391  | 0.97                                  | 0.34-2.73 | 0.953 |
| • Frail                          | 2.36                                                                                          | 0.59-9.50   | 0.226  | 1.23             | 0.58-2.61 | 0.585  | 0.69                                  | 0.69-2.20 | 0.530 |

**Supplemental Table 2.** Association between CGA results and clinical endpoints in hematological patients

|                                                              | Progressive disease and/or decline of IADL-independence ( $\geq 2$ points) 1 year after chemotherapy |           |       | Overall survival |           |       | Premature termination of chemotherapy |           |       |
|--------------------------------------------------------------|------------------------------------------------------------------------------------------------------|-----------|-------|------------------|-----------|-------|---------------------------------------|-----------|-------|
|                                                              | OR                                                                                                   | 95% CI    | p     | HR               | 95% CI    | p     | OR                                    | 95% CI    | p     |
| <b>Age</b>                                                   | 1.05                                                                                                 | 0.99-1.12 | 0.079 | 1.03             | 0.99-1.07 | 0.134 | 1.04                                  | 0.98-1.10 | 0.212 |
| <b>Tumor type</b>                                            |                                                                                                      |           | 0.339 |                  |           | 0.892 |                                       |           | 0.009 |
| • Low grade lymphoma or chronic leukemia <sup>a</sup> (n=65) | Ref                                                                                                  | Ref       | Ref   | Ref              | Ref       | Ref   | Ref                                   | Ref       | Ref   |
| • High grade lymphoma or acute leukemia (n=54)               | 1.43                                                                                                 | 0.66-3.13 | 0.368 | 1.14             | 0.66-1.99 | 0.635 | 0.91                                  | 0.41-2.02 | 0.824 |
| • Multiple myeloma (n=51)                                    | 1.80                                                                                                 | 0.81-3.97 | 0.147 | 1.08             | 0.61-1.93 | 0.791 | 2.80                                  | 1.30-6.02 | 0.009 |
| <b>Abnormal G8</b>                                           | 2.48                                                                                                 | 1.15-5.37 | 0.021 | 1.31             | 0.75-2.29 | 0.340 | 1.83                                  | 0.85-3.94 | 0.121 |
| <b>CGA</b>                                                   |                                                                                                      |           | 0.650 |                  |           | 0.352 |                                       |           | 0.259 |
| • Fit                                                        | Ref                                                                                                  | Ref       | Ref   | Ref              | Ref       | Ref   | Ref                                   | Ref       | Ref   |
| • Vulnerable                                                 | 1.56                                                                                                 | 0.55-4.44 | 0.404 | 1.59             | 0.68-3.69 | 0.280 | 1.19                                  | 0.39-3.57 | 0.763 |
| • Frail                                                      | 1.60                                                                                                 | 0.58-4.43 | 0.367 | 1.81             | 0.80-4.08 | 0.151 | 1.94                                  | 0.68-5.57 | 0.217 |
